# Supplementary material for: Generation and optimization of off-the-shelf immunotherapeutics targeting TCR-Vβ2+ T cell malignancy
Source: PubMed Central journal article supplement (PMC10789731; doi:10.1038/s41467-024-44786-2), 2024-01-15
Supplement: 41467_2024_44786_MOESM1_ESM.pdf [file 41467_2024_44786_MOESM1_ESM.pdf]

**Title:** Generation and optimization of off-the-shelf immunotherapeutics targeting TCR-V $\beta$ 2+ T cell malignancy

Jingjing Ren<sup>1,\* †</sup>, Xiaofeng Liao<sup>1,\* †</sup>, Julia M. Lewis<sup>1</sup>, Jungsoo Chang<sup>1</sup>, Rihao Qu<sup>2</sup>, Kacie R. Carlson<sup>1</sup>, Francine Foss<sup>3</sup>, Michael Girardi<sup>1,†</sup>

<sup>1</sup>Department of Dermatology, Yale School of Medicine, New Haven, CT, USA.

<sup>2</sup>The Computational Biology and Bioinformatics Program, Yale School of Medicine, New Haven, CT, USA.

<sup>3</sup>Department of Internal Medicine, Section of Medical Oncology, Yale School of Medicine, New Haven, CT, USA.

\* These authors contributed equally.

† Co-corresponding authors:

Michael Girardi, MD; Email: michael.girardi@yale.edu

Jingjing Ren, MD, PhD; Email: jingjing.ren@yale.edu

Xiaofeng Liao, PhD; Email: xiaofeng.liao@yale.edu

**Supplementary Fig. 1: mCAR-V $\beta$ 2 T cell development.**

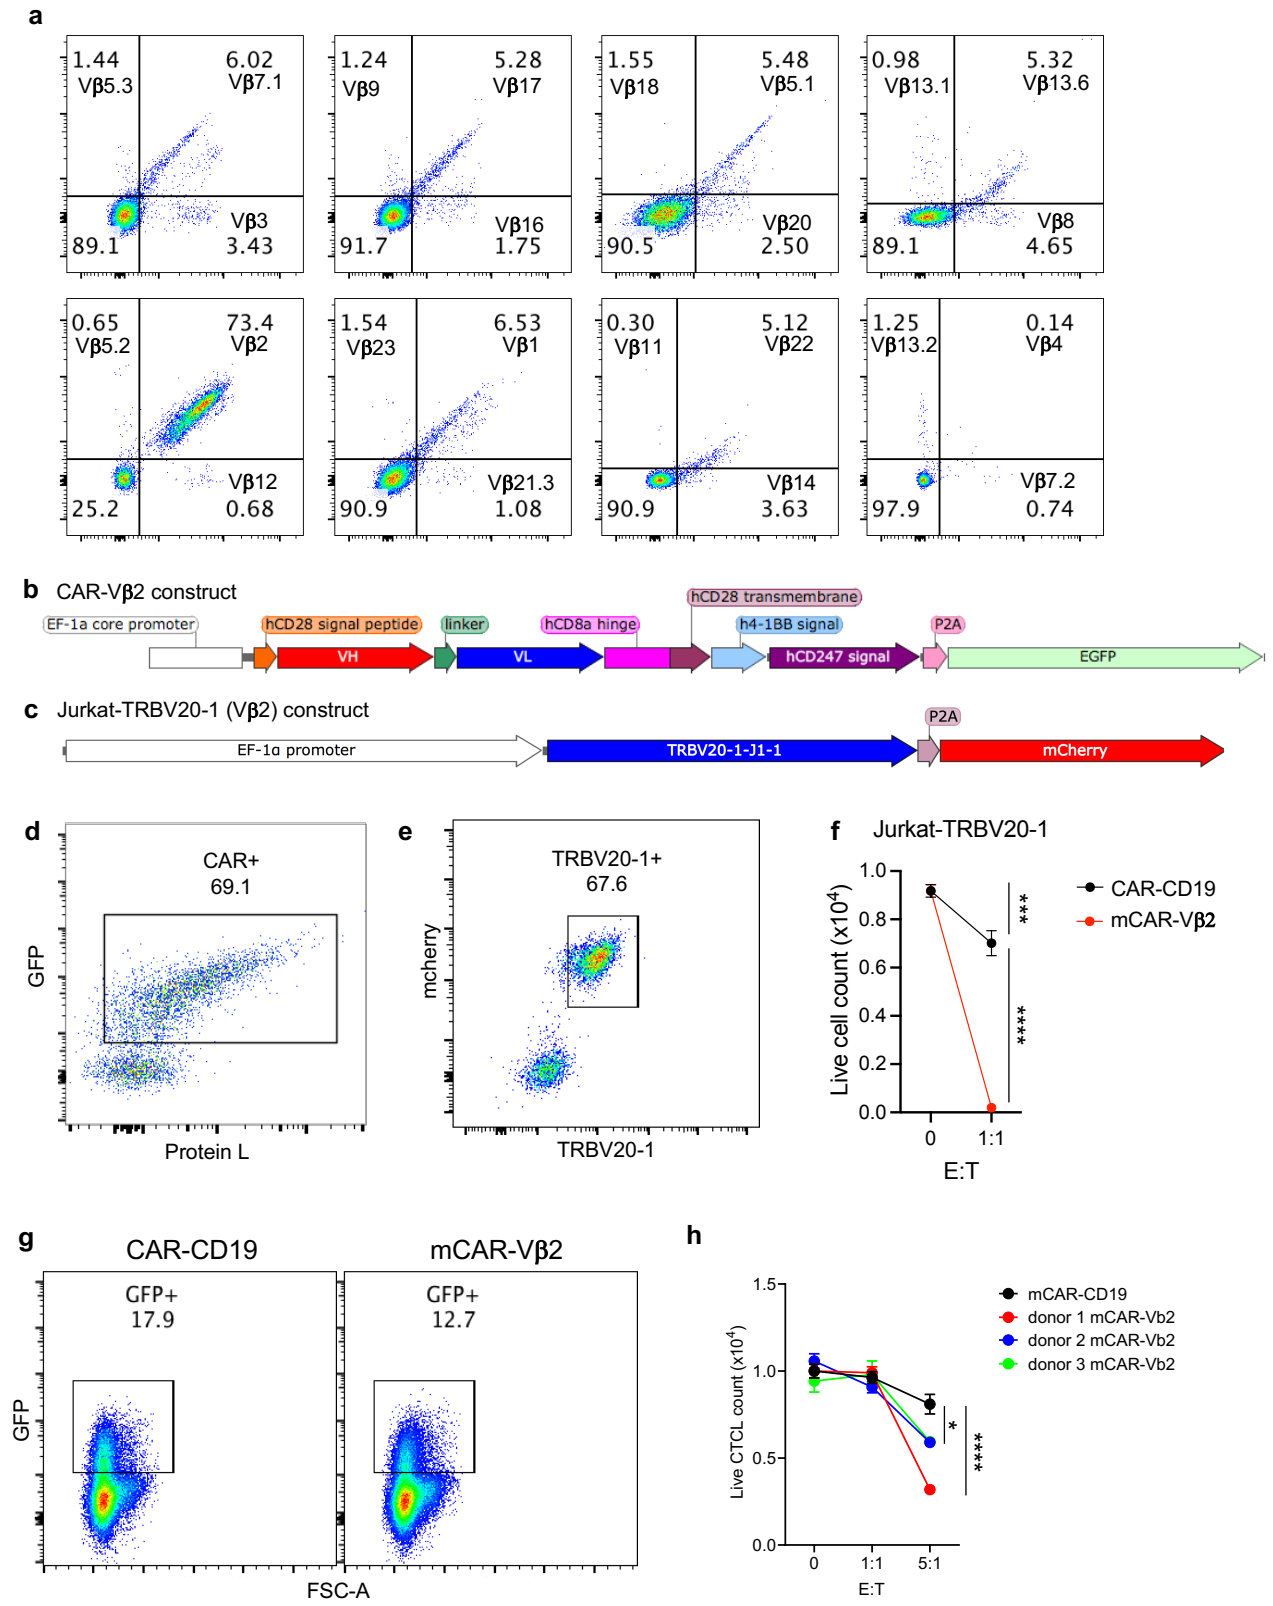

**Supplementary Fig. 1: mCAR-V $\beta$ 2 T cell development.**

**a**, Representative flow cytometry of total T cells from a CTCL patient with a V $\beta$ 2+ malignancy stained with a panel of anti-V $\beta$  antibodies showing the distribution of V $\beta$  family usage and predominance of V $\beta$ 2. **b**, Key components of CAR-V $\beta$ 2 construction in a lentiviral vector. **c**, Key components of TCR- $\beta$  chain TRBV20-1 containing construction in a lentiviral vector. **d**, GFP and surface CAR-V $\beta$ 2 expression in mCAR-V $\beta$ 2 T cells determined by flow cytometry. **e**, mcherry and surface TRBV20-1 expression in Jurkat-TRBV20-1 cells determined by flow cytometry. **f**, Live Jurkat-TRBV20-1 cell counts after overnight in vitro killing by allogeneic CAR-CD19 T cells (black) or mCAR-V $\beta$ 2 T cells (red) at 1:1 of E:T ratio, determined by flow cytometry. **g**, Lentiviral transduction efficiency of CAR-CD19 or mCAR-V $\beta$ 2 in CD8 T cells from a V $\beta$ 2+ CTCL patient, determined by flow cytometry detection of GFP. **h**, Live CTCL counts of three V $\beta$ 2+ CTCL patients after overnight in vitro killing by purified autologous CAR-CD19 T cells (black) or mCAR-V $\beta$ 2 T cells (red, blue and green) at different E:T ratios, determined by flow cytometry. Source data are provided as a Source Data file.

**Supplementary Fig. 2: Allogeneic mCAR-V $\beta$ 2 T cell generation.**

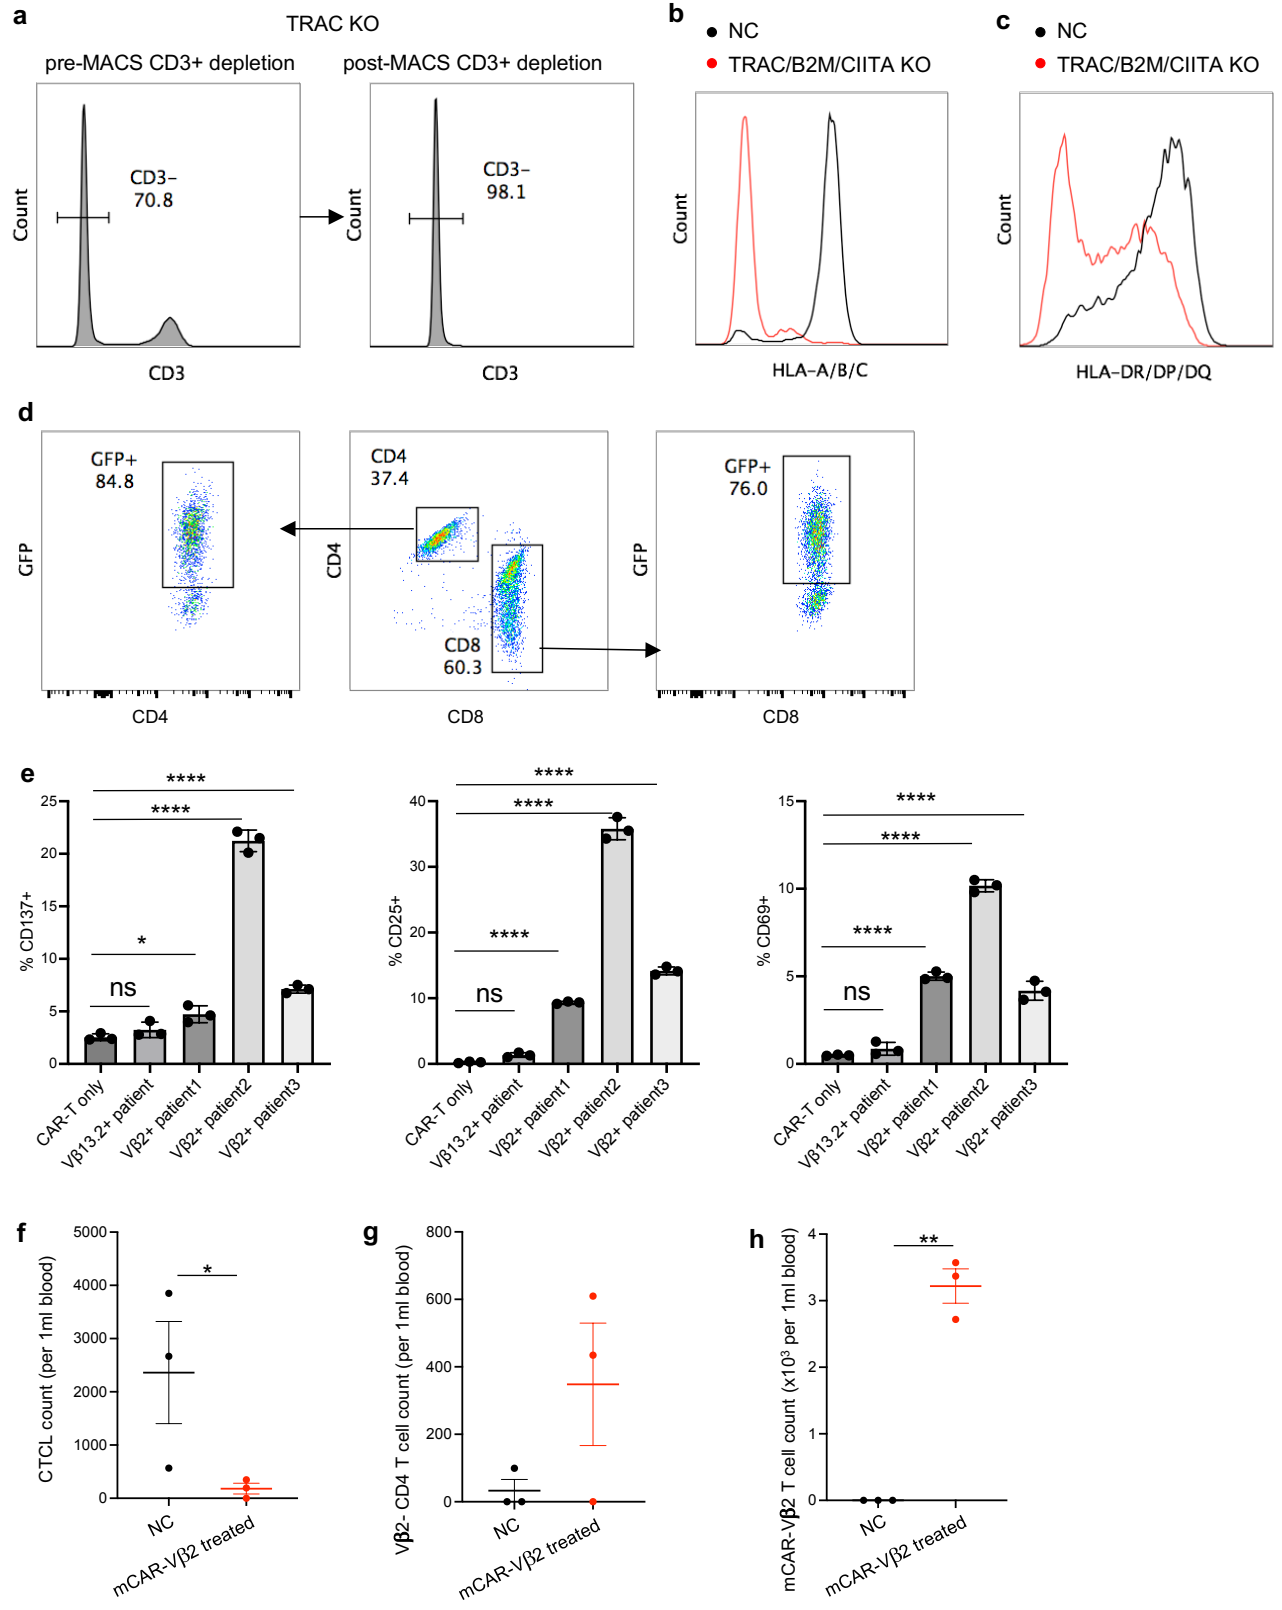

**Supplementary Fig. 2: Allogeneic mCAR-V $\beta$ 2 T cell generation.**

**a**, Flow cytometric histograms showing CD3 expression 2 days post TRAC KO in mCAR-V $\beta$ 2 T cells before (left) or after (right) residual CD3<sup>+</sup> cell depletion. **b**, HLA-A/B/C and **c**, HLA-DR/DP/DQ expression on mCAR-V $\beta$ 2 T cells with (red) or without (normal control (NC), black) triple (TRAC/B2M/CIITA) KO, determined by flow cytometry. **d**, Lentiviral transduction efficiency of mCAR-V $\beta$ 2 in CD8 and CD4 T cells from a healthy donor following triple KO, determined by flow cytometry detection of GFP. **e**, Activation marker CD137, CD25 and CD69 expression on triple KO mCAR-V $\beta$ 2 T cells after overnight in vitro culture alone or mixed with CTCL cells from three different V $\beta$ 2<sup>+</sup> patients and one V $\beta$ 13.2<sup>+</sup> patient, determined by flow cytometry. **f**, V $\beta$ 2<sup>+</sup> PTCL cell count, **g**, V $\beta$ 2-normal CD4<sup>+</sup> T cell count, and **h**, mCAR-V $\beta$ 2 T cell count in 1ml blood from NSG mice carrying CD4<sup>+</sup> malignant T cells from a V $\beta$ 2<sup>+</sup> PTCL patient and treated with (red) or without (NC, black) triple KO mCAR-V $\beta$ 2 T cells. **e**, n=3 replicates of each group. \*p<0.05 and \*\*\*\*p<0.0001 by one-way ANOVA. **f-h**, n=3 mice in each group (**f**, p=0.032, **h**, p=0.0026). \*p<0.05 and \*\*p<0.01 by t-test. Source data are provided as a Source Data file.

**Supplementary Fig. 3: CAR expression levels in humanized CAR-Vβ2 T cells.**

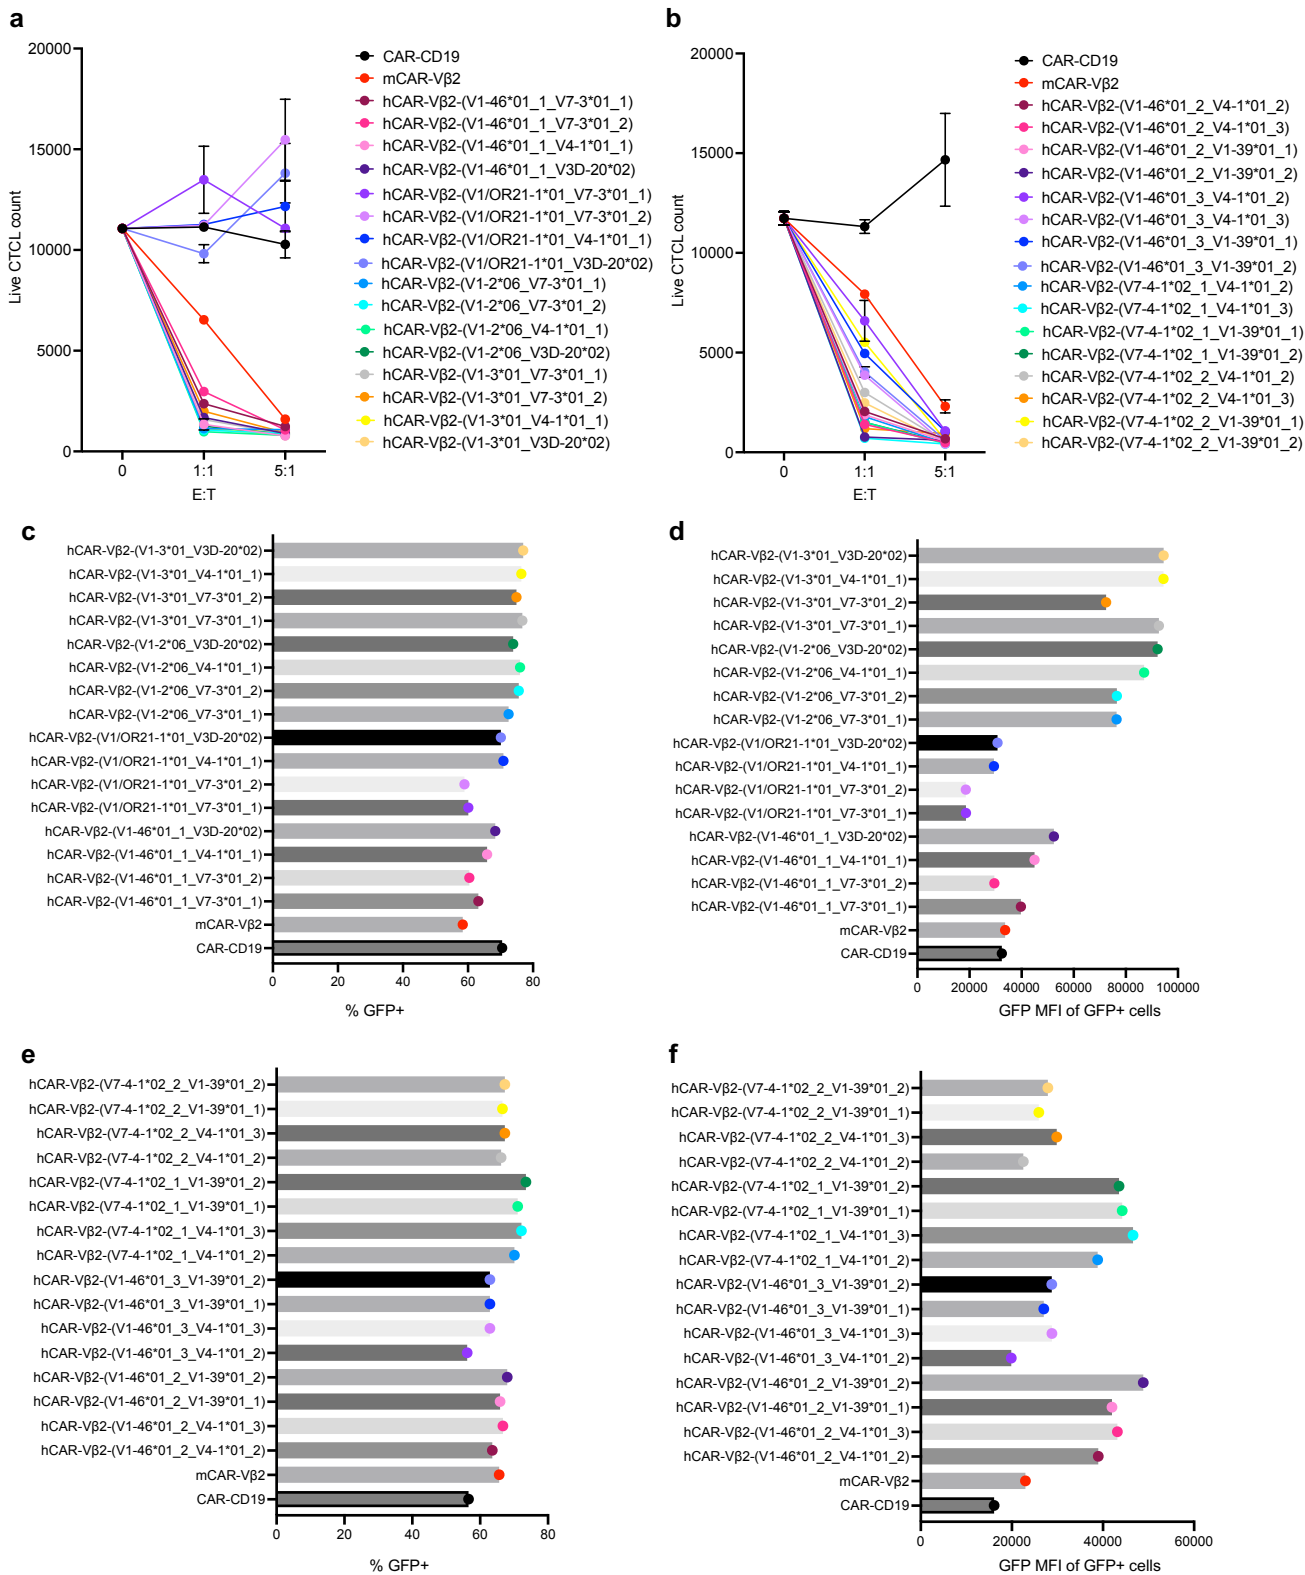

**Supplementary Fig. 3: CAR expression levels in humanized CAR-Vβ2 T cells.**

**a-b**, Live counts of CTCL cells from a Vβ2+ patient after overnight culture with a set of CAR-Vβ2 T cells humanized via two different in silico strategies provided by **a**, the BioPhi algorithm or **b**, a third-party contractor (mAbvce), as determined by flow cytometry. **c**, GFP+% and **d**, average GFP expression intensity of the GFP+ population of CAR-Vβ2 T cells after humanization using the BioPhi in silico algorithm, as determined by flow cytometry. **e**, GFP+% and **f**, average GFP expression intensity of the GFP+ population of CAR-Vβ2 T cells after humanization by mAbvce, as determined by flow cytometry. Source data are provided as a Source Data file.

**Supplementary Fig. 4: Immune reactivity of candidate humanized CAR-Vβ2.**

**a**

|                                  |                                   |                                   |                                  |                                   |                                   |                                   |                                   |                                  |
|----------------------------------|-----------------------------------|-----------------------------------|----------------------------------|-----------------------------------|-----------------------------------|-----------------------------------|-----------------------------------|----------------------------------|
| hCAR-Vβ2-(V1-46*01_2_V4-1*01_2)  | hCAR-Vβ2-(V1-46*01_2_V4-1*01_3)   | hCAR-Vβ2-(V1-46*01_2_V1-39*01_1)  | hCAR-Vβ2-(V1-46*01_2_V1-39*01_2) | hCAR-Vβ2-(V1-46*01_3_V4-1*01_2)   | hCAR-Vβ2-(V1-46*01_3_V4-1*01_3)   | hCAR-Vβ2-(V1-46*01_3_V1-39*01_1)  | hCAR-Vβ2-(V1-46*01_3_V1-39*01_2)  | hCAR-Vβ2-(V7-4-1*02_1_V4-1*01_2) |
| hCAR-Vβ2-(V7-4-1*02_1_V4-1*01_3) | hCAR-Vβ2-(V7-4-1*02_1_V1-39*01_1) | hCAR-Vβ2-(V7-4-1*02_1_V1-39*01_2) | hCAR-Vβ2-(V7-4-1*02_2_V4-1*01_2) | hCAR-Vβ2-(V7-4-1*02_2_V4-1*01_3)  | hCAR-Vβ2-(V7-4-1*02_2_V1-39*01_1) | hCAR-Vβ2-(V7-4-1*02_2_V1-39*01_2) | CAR-CD19                          | mCAR-Vβ2                         |
| hCAR-Vβ2-(V1-46*01_1_V7-3*01_1)  | hCAR-Vβ2-(V1-46*01_1_V7-3*01_2)   | hCAR-Vβ2-(V1-46*01_1_V4-1*01_1)   | hCAR-Vβ2-(V1-46*01_1_V3D-20*02)  | hCAR-Vβ2-(V1/OR21-1*01_V7-3*01_1) | hCAR-Vβ2-(V1/OR21-1*01_V7-3*01_2) | hCAR-Vβ2-(V1/OR21-1*01_V4-1*01_1) | hCAR-Vβ2-(V1/OR21-1*01_V3D-20*02) | hCAR-Vβ2-(V1-2*06_V7-3*01_1)     |
| hCAR-Vβ2-(V1-2*06_V7-3*01_2)     | hCAR-Vβ2-(V1-2*06_V4-1*01_1)      | hCAR-Vβ2-(V1-2*06_V3D-20*02)      | hCAR-Vβ2-(V1-3*01_V7-3*01_1)     | hCAR-Vβ2-(V1-3*01_V7-3*01_2)      | hCAR-Vβ2-(V1-3*01_V4-1*01_1)      | hCAR-Vβ2-(V1-3*01_V3D-20*02)      | CAR-CD19                          | mCAR-Vβ2                         |





**C**

**Vβ1 patient**

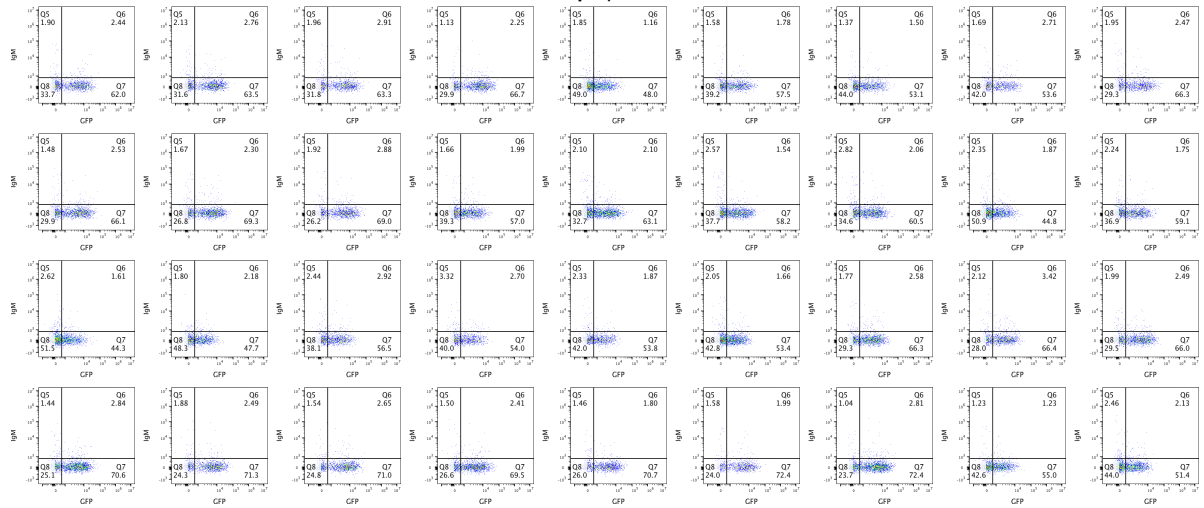

**Vβ2 patient**

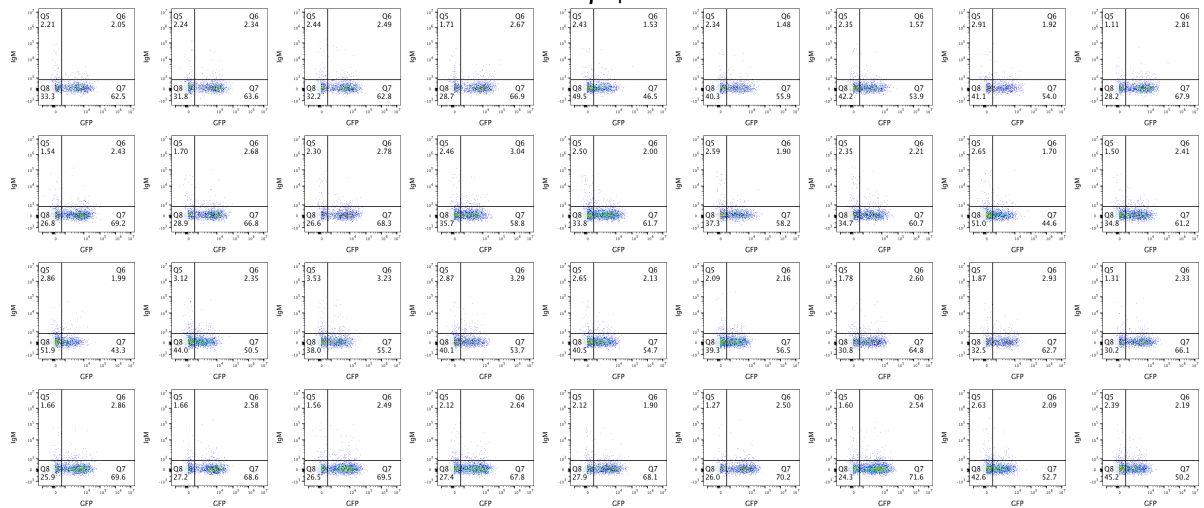

**Vβ13.2 patient**

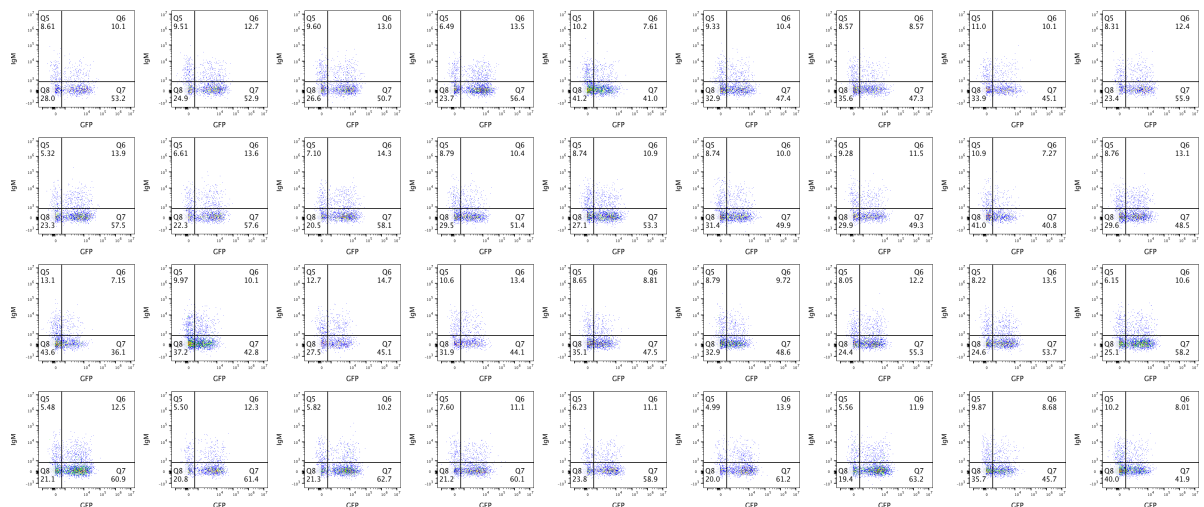

**d**

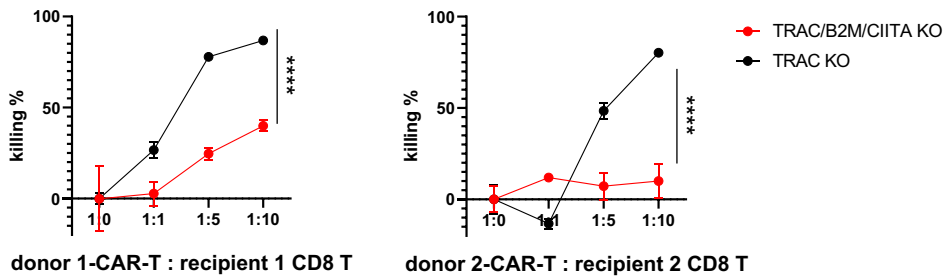

**Supplementary Fig. 4: Immune reactivity of candidate humanized CAR-V $\beta$ 2.**

**a**, The sample layout used to test for the presence of pre-existing IgM antibody directed against the panel of allogeneic humanized CAR-V $\beta$ 2 T cells in sera from **b**, three healthy controls or **c**, three CTCL patients, as determined by flow cytometry. **d**, MLR assay to detect killing by CD8 T cells from two donors mixed with TRAC-KO (black) or TRAC/B2M/CIITA (triple)-KO hCAR-V $\beta$ 2 T cells generated from two additional donors. n=3 replicates of each group. \*\*\*\*p<0.0001 by two-way ANOVA. Source data are provided as a Source Data file.

**Supplementary Fig. 5: CRISPR-AAV system for CAR-V $\beta$ 2 T cell generation.**

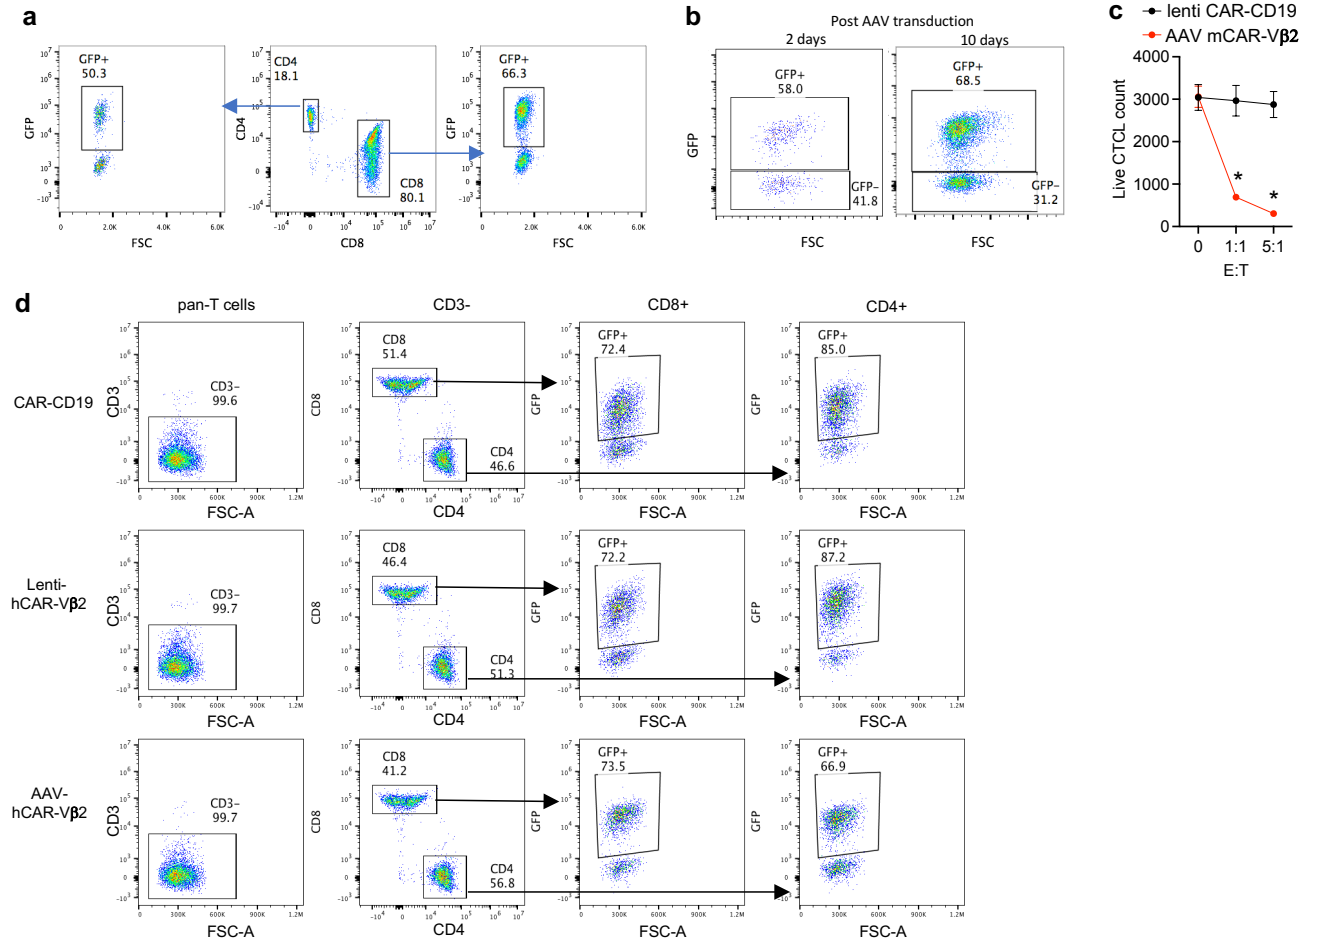

**Supplementary Fig. 5: CRISPR-AAV system for CAR-V $\beta$ 2 T cell generation.**

**a**, Representative flow cytometry showing CD4 and CD8 population percentages and expression of GFP as CAR reporter on AAV-dependent allogeneic mCAR-V $\beta$ 2 T cells. **b**, Expression of GFP as CAR reporter on mCAR-V $\beta$ 2 T cells two days and ten days post triple KO and AAV-mCAR-V $\beta$ 2 transduction, determined by flow cytometry. **c**, Patient derived V $\beta$ 2+ CTCL cell counts after overnight in vitro co-culture with allogeneic triple KO mCAR-V $\beta$ 2 pan-T cells generated via CRISPR/AAV system (red) compared to allogeneic triple KO CAR-CD19 pan-T cells generated via lentivirus transduction (black), at different effector to target (E:T) ratios. **d**, Representative flow cytometry showing CD3- purity, CD4 and CD8 population percentages and expression of GFP as CAR reporter on lenti-CAR-CD19, lenti-hCAR-V $\beta$ 2 and AAV-hCAR-V $\beta$ 2 T cells. **c**, n=3 replicates in each group. \*p<0.05 by two-way ANOVA. Source data are provided as a Source Data file.

**Supplementary Fig. 6: hCAR-V $\beta$ 2 T cell recovery in cytokine optimization.**

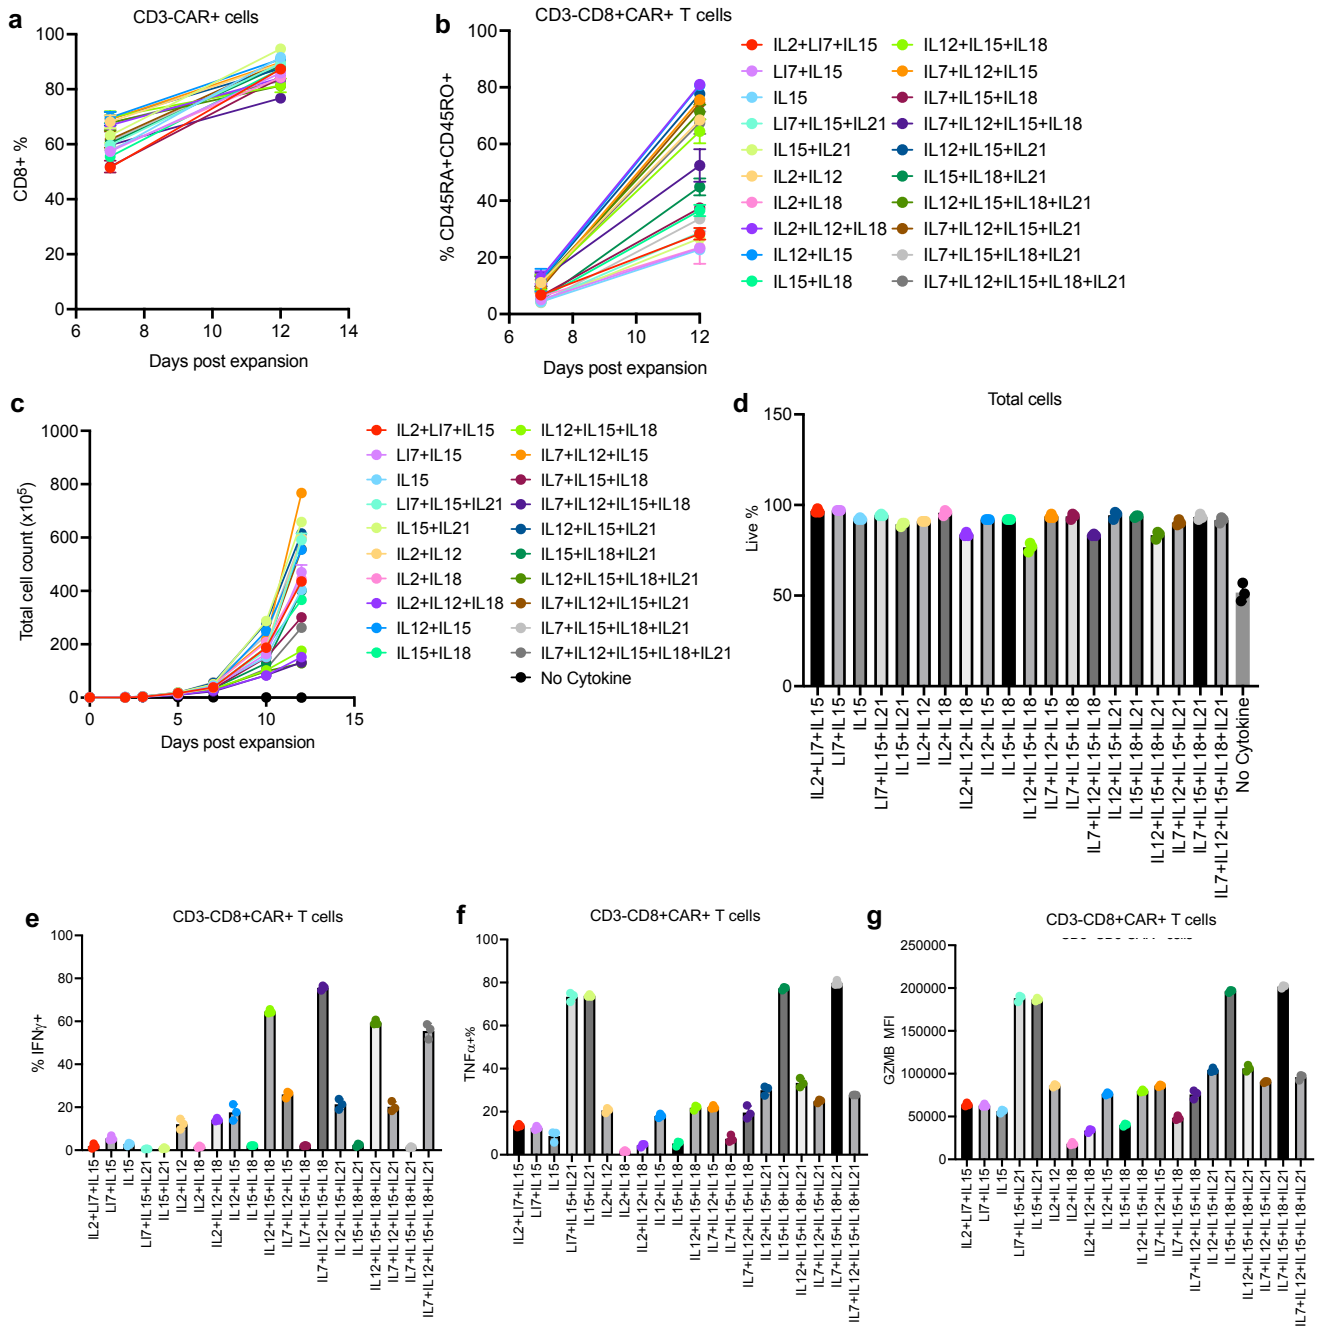

**Supplementary Fig. 6: hCAR-V $\beta$ 2 T cell recovery in cytokine optimization.**

**a**, CD8+ % in 7-day and 12-day cytokine expanded CD3- hCAR-V $\beta$ 2 T cells, determined by flow cytometry. n=3 replicates in each group. **b**, CD45RA+CD45RO+ % of 7-day and 12-day cytokine expanded resting CD8+CD3- hCAR-V $\beta$ 2 T cells, determined by flow cytometry. **c**, Live total T cell counts during cytokine expansion in vitro, determined by trypan blue cell counting. **d**, Percentage of viable total T cells following 12-day cytokine expansion, determined by trypan blue cell counting. **e**, IFN $\gamma$ + % of 12-day cytokine expanded resting CD8+CD3- hCAR-V $\beta$ 2 T cells, determined by flow cytometry. **f**, TNF $\alpha$ + % and **g**, GZMB MFI of 12-day cytokine expanded resting CD8+C3- hCAR-V $\beta$ 2 T cells, determined by flow cytometry. Source data are provided as a Source Data file.

**Supplementary Fig. 7: Humanized anti-V $\beta$ 2 therapeutic antibody with enhanced ADCC.**

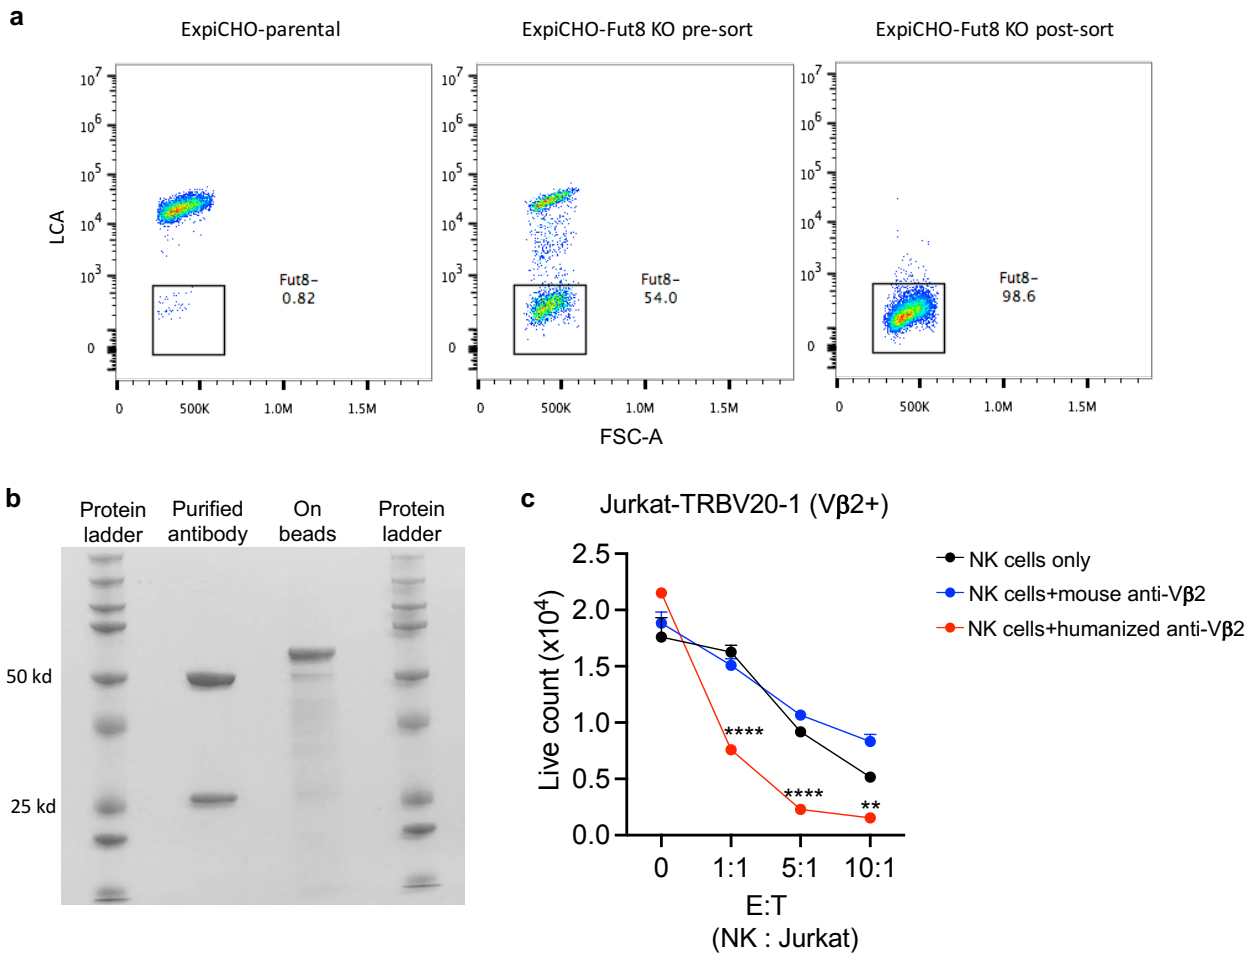

**Supplementary Fig. 7: Humanized anti-V $\beta$ 2 therapeutic antibody with enhanced ADCC.**

**a**, Lens Culinaris Agglutinin (LCA) expression on the surface of parental expiCHO cells, pre-sorted expiCHO cells post Fut8 KO or post-sorted expiCHO cells post Fut8 KO, determined by flow cytometry. **b**, SDS-PAGE of purified humanized anti-V $\beta$ 2 antibody sample and denatured protein sample from protein G beads post antibody elution. **c**, Live Jurkat-TRBV20-1 cell counts, after overnight co-culture with NK cells from a healthy donor as effector cells at different E:T ratios without antibody addition (black) or mixed with 100ng/ml mouse anti-V $\beta$ 2 antibody (blue) or humanized anti-V $\beta$ 2 antibody (red), determined by flow cytometry. n=3 replicates in each group. \*\*p<0.01 and \*\*\*\*p<0.0001 by two-way ANOVA. Source data are provided as a Source Data file.

**Supplementary Fig. 8: Flow cytometry gating strategies.**

**a**

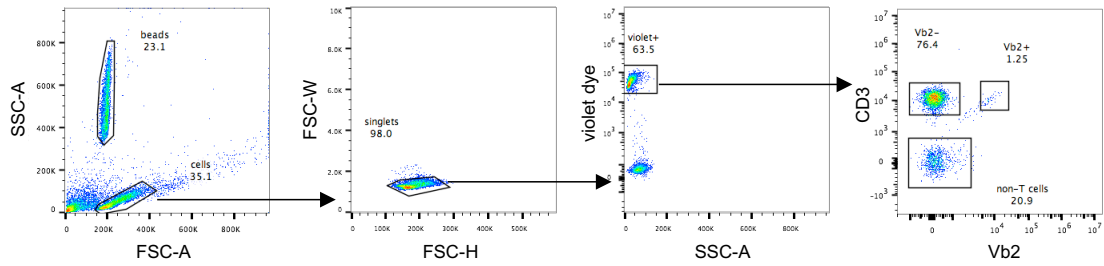

**b**

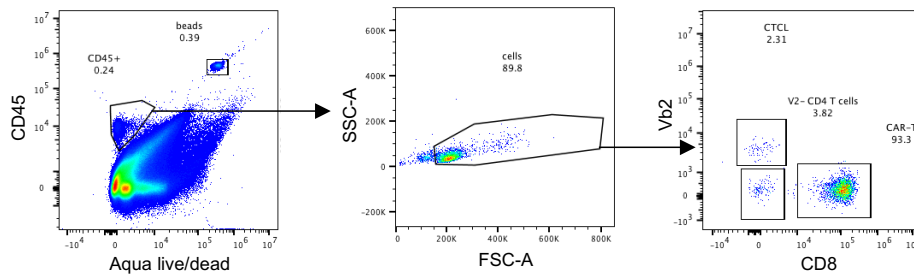

**c**

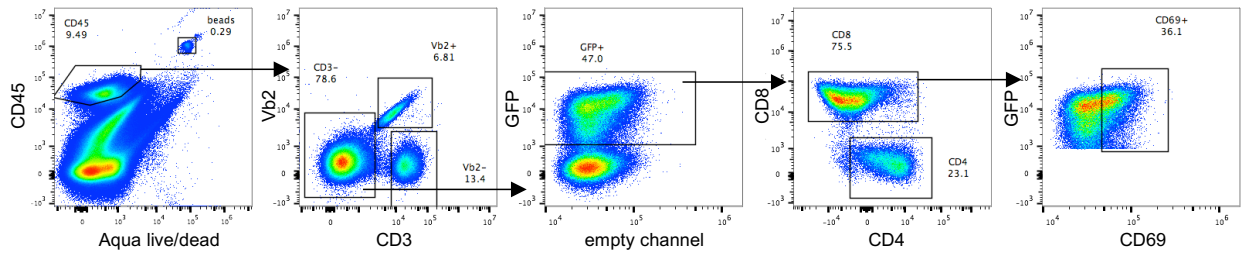

**d**

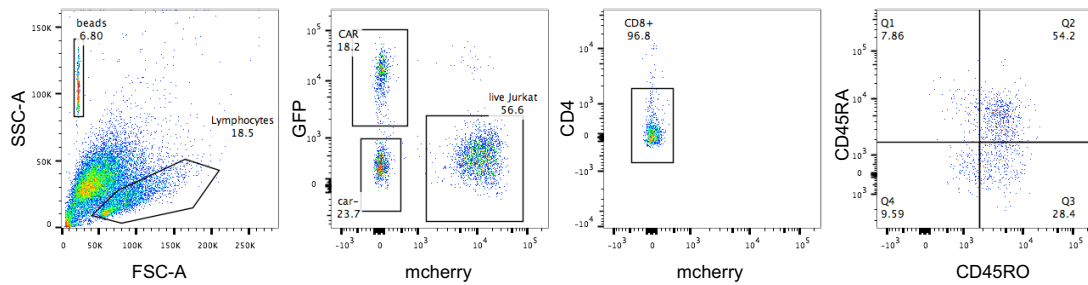

**Supplementary Fig. 8: Flow cytometry gating strategies.**

a, Gating strategy for Fig. 1 c-f, Fig. 4 c-d and Fig. 6 c-h. b, Gating strategy for Fig. 2 b-l and Fig.

3. c, Gating strategy for Fig. 4 e-k. d, Gating strategy for Fig. 5 c-f.



**Supplementary Table 1.**

| No. | cytokine combination    |
|-----|-------------------------|
| 1   | IL2+IL7+IL15            |
| 2   | IL7+IL15                |
| 3   | IL15                    |
| 4   | IL7+IL15+IL21           |
| 5   | IL15+IL21               |
| 6   | IL2+IL12                |
| 7   | IL2+IL18                |
| 8   | IL2+IL12+IL18           |
| 9   | IL12+IL15               |
| 10  | IL15+IL18               |
| 11  | IL12+IL15+IL18          |
| 12  | IL7+IL12+IL15           |
| 13  | IL7+IL15+IL18           |
| 14  | IL7+IL12+IL15+IL18      |
| 15  | IL12+IL15+IL21          |
| 16  | IL15+IL18+IL21          |
| 17  | IL12+IL15+IL18+IL21     |
| 18  | IL7+IL12+IL15+IL21      |
| 19  | IL7+IL15+IL18+IL21      |
| 20  | IL7+IL12+IL15+IL18+IL21 |

**Supplementary Table 2.**

| Gene     | sgRNA sequence       |
|----------|----------------------|
| TRAC     | TCAGGGTTCTGGATATCTGT |
| B2M      | AAGTCAACTTCAATGTCGGA |
| CIITA    | GTGGCACACTGTGAGCTGCC |
| TRBV12-3 | GCAAAGGGACACACAGCAGA |
| Fut8     | AGTTGAAACTCTGAAAATGC |
