# Supplementary material for: Generation and optimization of off-the-shelf immunotherapeutics targeting TCR-Vβ2+ T cell malignancy
Source: PubMed Central journal article supplement (PMC10789731; doi:10.1038/s41467-024-44786-2), 2024-01-15
Supplement: 41467_2024_44786_MOESM3_ESM.pdf [file 41467_2024_44786_MOESM3_ESM.pdf]

## Reporting Summary

Nature Portfolio wishes to improve the reproducibility of the work that we publish. This form provides structure for consistency and transparency in reporting. For further information on Nature Portfolio policies, see our [Editorial Policies](#) and the [Editorial Policy Checklist](#).

### Statistics

For all statistical analyses, confirm that the following items are present in the figure legend, table legend, main text, or Methods section.

- | n/a                                 | Confirmed                                                                                                                                                                                                                                                                                      |
|-------------------------------------|------------------------------------------------------------------------------------------------------------------------------------------------------------------------------------------------------------------------------------------------------------------------------------------------|
| <input type="checkbox"/>            | <input checked="" type="checkbox"/> The exact sample size ( $n$ ) for each experimental group/condition, given as a discrete number and unit of measurement                                                                                                                                    |
| <input type="checkbox"/>            | <input checked="" type="checkbox"/> A statement on whether measurements were taken from distinct samples or whether the same sample was measured repeatedly                                                                                                                                    |
| <input type="checkbox"/>            | <input checked="" type="checkbox"/> The statistical test(s) used AND whether they are one- or two-sided<br><i>Only common tests should be described solely by name; describe more complex techniques in the Methods section.</i>                                                               |
| <input type="checkbox"/>            | <input checked="" type="checkbox"/> A description of all covariates tested                                                                                                                                                                                                                     |
| <input checked="" type="checkbox"/> | <input type="checkbox"/> A description of any assumptions or corrections, such as tests of normality and adjustment for multiple comparisons                                                                                                                                                   |
| <input type="checkbox"/>            | <input checked="" type="checkbox"/> A full description of the statistical parameters including central tendency (e.g. means) or other basic estimates (e.g. regression coefficient) AND variation (e.g. standard deviation) or associated estimates of uncertainty (e.g. confidence intervals) |
| <input type="checkbox"/>            | <input checked="" type="checkbox"/> For null hypothesis testing, the test statistic (e.g. $F$ , $t$ , $r$ ) with confidence intervals, effect sizes, degrees of freedom and $P$ value noted<br><i>Give <math>P</math> values as exact values whenever suitable.</i>                            |
| <input checked="" type="checkbox"/> | <input type="checkbox"/> For Bayesian analysis, information on the choice of priors and Markov chain Monte Carlo settings                                                                                                                                                                      |
| <input checked="" type="checkbox"/> | <input type="checkbox"/> For hierarchical and complex designs, identification of the appropriate level for tests and full reporting of outcomes                                                                                                                                                |
| <input checked="" type="checkbox"/> | <input type="checkbox"/> Estimates of effect sizes (e.g. Cohen's $d$ , Pearson's $r$ ), indicating how they were calculated                                                                                                                                                                    |

*Our web collection on [statistics for biologists](#) contains articles on many of the points above.*

### Software and code

Policy information about [availability of computer code](#)

Data collection

Data analysis

For manuscripts utilizing custom algorithms or software that are central to the research but not yet described in published literature, software must be made available to editors and reviewers. We strongly encourage code deposition in a community repository (e.g. GitHub). See the Nature Portfolio [guidelines for submitting code & software](#) for further information.

### Data

Policy information about [availability of data](#)

All manuscripts must include a [data availability statement](#). This statement should provide the following information, where applicable:

- Accession codes, unique identifiers, or web links for publicly available datasets
- A description of any restrictions on data availability
- For clinical datasets or third party data, please ensure that the statement adheres to our [policy](#)

Data supporting the findings of the study are available within the Article, Supplementary Information and Source data file. Human-related data that were collected but not shown in the paper might be subject to confidentiality (e.g., sex and age). All outstanding data are available upon request from the corresponding author, Michael Girardi (michael.girardi@yale.edu) due to the intellectual property protection applications that are currently under consideration for the disclosed

innovations.

## Research involving human participants, their data, or biological material

Policy information about studies with [human participants or human data](#). See also policy information about [sex, gender \(identity/presentation\), and sexual orientation](#) and [race, ethnicity and racism](#).

|                                                                    |                                                                                                                                                                                                                                                                                                                                                                                                                                                                                           |
|--------------------------------------------------------------------|-------------------------------------------------------------------------------------------------------------------------------------------------------------------------------------------------------------------------------------------------------------------------------------------------------------------------------------------------------------------------------------------------------------------------------------------------------------------------------------------|
| Reporting on sex and gender                                        | These findings are not sex or gender specific. Individuals of both sexes, regardless of gender, were invited to participate in the study. Sex assigned at birth from their medical record is used for reporting. Low sample size precludes sex- and gender-based analyses.                                                                                                                                                                                                                |
| Reporting on race, ethnicity, or other socially relevant groupings | These findings are not race, ethnicity or other socially relevant groupings specific.                                                                                                                                                                                                                                                                                                                                                                                                     |
| Population characteristics                                         | Patients previously diagnosed with CTCL or PTCL who have an identifiable malignant T cell population in their peripheral blood will be recruited. This includes both males and females of all races ranging in age from 18-90 years. Because disease incidence increases with increasing age, older subjects predominate. In this study, a limited number of anonymous adult volunteers aged from 35-55 were recruited as healthy donors without a history of cancer or immune disorders. |
| Recruitment                                                        | YNHH Oncology and Photopheresis Unit physicians or mid-level provider discuss the possibility of participating in this study with their patients during the normal course of their care for the treatment of CTCL or PTCL. We impartially chose patients with a significant presence of high blood cancer involvement. The healthy donors in this study were randomly selected from available volunteers. <b>Informed consent was obtained.</b>                                           |
| Ethics oversight                                                   | The protocols involved in this study are all approved by Yale University Institutional Review Board and Human Investigation Committee                                                                                                                                                                                                                                                                                                                                                     |

Note that full information on the approval of the study protocol must also be provided in the manuscript.

## Field-specific reporting

Please select the one below that is the best fit for your research. If you are not sure, read the appropriate sections before making your selection.

Life sciences  Behavioural & social sciences  Ecological, evolutionary & environmental sciences

For a reference copy of the document with all sections, see [nature.com/documents/nr-reporting-summary-flat.pdf](https://www.nature.com/documents/nr-reporting-summary-flat.pdf)

## Life sciences study design

All studies must disclose on these points even when the disclosure is negative.

|                 |                                                                                                                                                                                                                                                                                                                                                                                                                                                                                                        |
|-----------------|--------------------------------------------------------------------------------------------------------------------------------------------------------------------------------------------------------------------------------------------------------------------------------------------------------------------------------------------------------------------------------------------------------------------------------------------------------------------------------------------------------|
| Sample size     | Sample sizes were primarily determined by availability of materials, e.g. patient-derived malignant cells. No power calculations were performed. The sample size for in vivo mouse studies utilizing the Jurkat-Vb2 tumor cell line were determined based on pilot experiments assessing the tumor cell line growth characteristics which we found to be sufficiently similar from mouse to mouse such that groups of N=5 mice could be used to reasonably assess the effects of different treatments. |
| Data exclusions | No data were excluded from the analyses.                                                                                                                                                                                                                                                                                                                                                                                                                                                               |
| Replication     | To ensure robustness of the data two different viral vectors (AAV and Lentivirus) were used and in this way CAR-T manufacturing was replicated. Both Vb2 expressing Jurkat cells and Vb2+ patient derived cells were used as a way to replicate both in vitro and in vivo experiments. Experiments were also repeated by using cells from multiple donors. All attempts at replication were successful.                                                                                                |
| Randomization   | Tumor-bearing mice were randomly allocated into experimental groups. Cells from limited donors were equally used into different experimental conditions for in vitro studies.                                                                                                                                                                                                                                                                                                                          |
| Blinding        | Investigators were blinded to group identification for data collection and analysis.                                                                                                                                                                                                                                                                                                                                                                                                                   |

## Reporting for specific materials, systems and methods

We require information from authors about some types of materials, experimental systems and methods used in many studies. Here, indicate whether each material, system or method listed is relevant to your study. If you are not sure if a list item applies to your research, read the appropriate section before selecting a response.

## Materials &amp; experimental systems

| n/a                                 | Involvement                                                     |
|-------------------------------------|-----------------------------------------------------------------|
| <input type="checkbox"/>            | <input checked="" type="checkbox"/> Antibodies                  |
| <input type="checkbox"/>            | <input checked="" type="checkbox"/> Eukaryotic cell lines       |
| <input checked="" type="checkbox"/> | <input type="checkbox"/> Palaeontology and archaeology          |
| <input type="checkbox"/>            | <input checked="" type="checkbox"/> Animals and other organisms |
| <input checked="" type="checkbox"/> | <input type="checkbox"/> Clinical data                          |
| <input checked="" type="checkbox"/> | <input type="checkbox"/> Dual use research of concern           |
| <input checked="" type="checkbox"/> | <input type="checkbox"/> Plants                                 |

## Methods

| n/a                                 | Involvement                                        |
|-------------------------------------|----------------------------------------------------|
| <input checked="" type="checkbox"/> | <input type="checkbox"/> ChIP-seq                  |
| <input type="checkbox"/>            | <input checked="" type="checkbox"/> Flow cytometry |
| <input checked="" type="checkbox"/> | <input type="checkbox"/> MRI-based neuroimaging    |

## Antibodies

## Antibodies used

Beckman Coulter: anti-VEG<sub>2</sub>-PE/FITC kit (Beckman, IM3497); Biolegend: anti-CD3-APC (300312), anti-CD4-APC-Cy7 (300518), anti-CD8-PE-Cy7 (344750), anti-CD45-PerCP-Cy5.5 (368504), anti-HLA-A/B/C-Pacific Blue (311418), anti-HLA-DR/DP/DQ-PE (361716), anti-4-1BB-BV421 (309819), anti-CD25-PE-Cy7 (302612), anti-CD69-PerCP-Cy5.5 (310926), anti-CD45RA-AF700 (304119), anti-CD45RO-BV510 (304246), anti-GZMB-APC (372204), anti-IFN $\gamma$ -PE (506507), and anti-TNF $\beta$ -APC-Cy7 (502944); Thermofisher: anti-human IgM-AF647 (314536) and anti-human IgG Fc-PE (MA110377). Protein L-PE (Cell Signaling Technology, #58036) and Lens Culinaris Agglutinin (LCA)-FITC (Thermofisher, L32475) staining were performed as surface antibody staining in 1xPBS. The antibody concentration applied in all assays adhere to the manufacturer's instructions and recommendations.

## Validation

Primary antibodies were used for the target, species and application (flow cytometry) identified by the manufacturer. Research Resource Identifiers (RRIDs) were obtained from The Antibody Registry (antibodyregistry.org):

Biolegend 300312 RRID:AB\_314048  
 Biolegend 300518 RRID:AB\_314086  
 Biolegend 344750 RRID:AB\_2687201  
 Biolegend 368504 RRID:AB\_2566352  
 Biolegend 311418 RRID:AB\_493669  
 Biolegend 361716 RRID:AB\_2750318  
 Biolegend 309819 RRID:AB\_10895902  
 Biolegend 302612 RRID:AB\_314282  
 Biolegend 310926 RRID:AB\_2074956  
 Biolegend 304119 RRID:AB\_493762  
 Biolegend 304246 RRID:AB\_2565801  
 Biolegend 345008 RRID:AB\_11218598  
 Biolegend 329918 RRID:AB\_2159324  
 Biolegend 372204 RRID:AB\_2687028  
 Biolegend 506507 RRID:AB\_315440  
 Biolegend 502944 RRID:AB\_2562870  
 Biolegend 500326 RRID:AB\_2125593

## Eukaryotic cell lines

Policy information about [cell lines and Sex and Gender in Research](#)

## Cell line source(s)

ThermoFisher: ExpiCHO; ATCC: Jurkat (TIB-152, Clone E6-1); Promega: Jurkat-NFAT-luciferase effector cells;

## Authentication

none of the cell lines used were authenticated

## Mycoplasma contamination

All cell lines tested negative for Mycoplasma contamination.

Commonly misidentified lines  
(See [ICLAC](#) register)

No commonly misidentified cell lines were used in the study.

## Animals and other research organisms

Policy information about [studies involving animals; ARRIVE guidelines](#) recommended for reporting animal research, and [Sex and Gender in Research](#)

## Laboratory animals

8-12 wk old NOD.Cg-Prkdcscid Il2rgtm1Wjl/SzJ (NSG) mice were purchased from The Jackson Laboratory. Mice were bred and maintained under specific pathogen-free conditions with a 12 hr light/dark cycle at 70-72°F, 45-50% humidity with food and water provided ad libitum.

## Wild animals

This study didn't involve wild animals

## Reporting on sex

In this finding, we used both male and female mice

Field-collected samples

Ethics oversight

Note that full information on the approval of the study protocol must also be provided in the manuscript.

## Plants

Seed stocks

Novel plant genotypes

Authentication

## Flow Cytometry

### Plots

Confirm that:

- The axis labels state the marker and fluorochrome used (e.g. CD4-FITC).
- The axis scales are clearly visible. Include numbers along axes only for bottom left plot of group (a 'group' is an analysis of identical markers).
- All plots are contour plots with outliers or pseudocolor plots.
- A numerical value for number of cells or percentage (with statistics) is provided.

### Methodology

Sample preparation

Instrument

Software

Cell population abundance

Gating strategy

- Tick this box to confirm that a figure exemplifying the gating strategy is provided in the Supplementary Information.
